# Supplementary material for: Antileishmanial Aminopyrazoles: Studies into Mechanisms and Stability of Experimental Drug Resistance
Source: PubMed Central journal article supplement (PMC7449183; doi:10.1128/aac.00152-20), 2020-08-20
Supplement: AAC.00152-20-s0001.pdf [file AAC.00152-20-s0001.pdf]

## Supplementary data

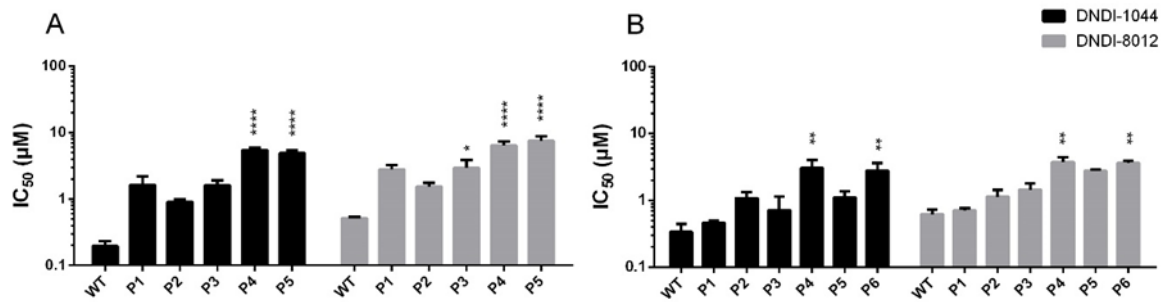

**Figure S1: Comparison of the *in vitro* susceptibility in the extracellular promastigote assay of the wild type parent (WT) with selected lines LEM3323Cl<sub>4</sub>/1044 (A) and LEM3323Cl<sub>4</sub>/8012 (B) at each passage following exposure to the APs DNDI-1044 and DNDI-8012.** Results are expressed as the mean IC<sub>50</sub> (µM) ± SEM and are based on two independent replicates run in duplicate. (\*: p < 0.05, \*\*: p < 0.01, \*\*\*\*: p < 0.0001).

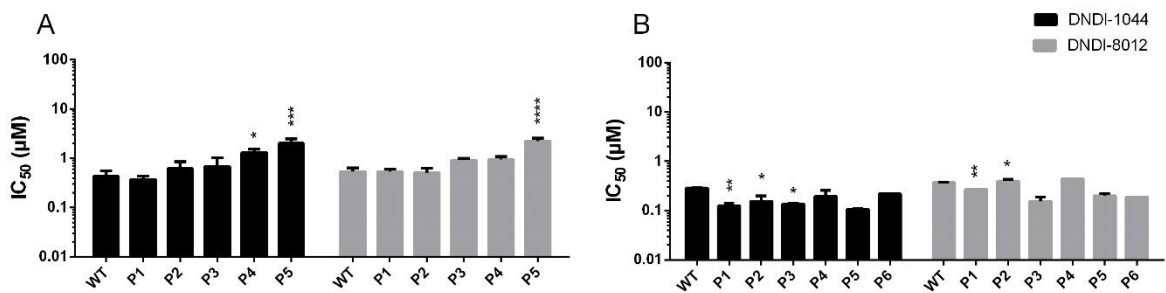

**Figure S2: Comparison of the *in vitro* susceptibility in the intracellular amastigote assay of the wild type (WT) parent with selected lines LEM3323Cl<sub>4</sub>/1044 (A) and LEM3323Cl<sub>4</sub>/8012 (B) at each passage following exposure to the APs DNDI-1044 and DNDI-8012.** Results are expressed as the mean IC<sub>50</sub> (µM) ± SEM and are based on two independent replicates run in duplicate. (\*: p < 0.05, \*\*: p < 0.01, \*\*\*: p < 0.001, \*\*\*\*: p < 0.0001).

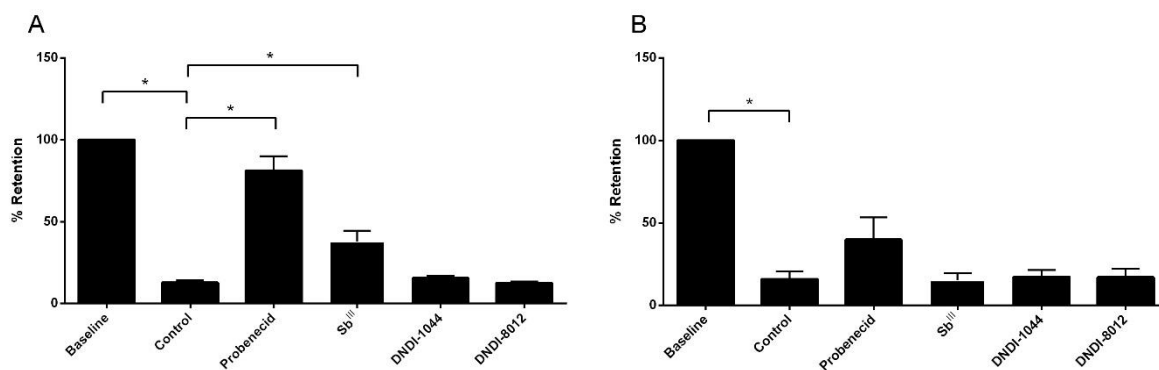

**Figure S3: Percentage retention of 5(6)-carboxy-2'-7'-dichlorofluorescein (CDCF) in uninfected (A) and infected (B) macrophages after 2h of efflux with probenecid or the aminopyrazoles.** Results are based on two independent repeats run in duplicate and are expressed as the mean of the  $IC_{50} \pm$  the standard mean of error (SEM) (\* $p < 0.05$ ).

**Table S1.** Chemical structure of the aminopyrazole series.

|           |  |
|-----------|--|
| DNDI-1044 |  |
| DNDI-8012 |  |
| DNDI-5561 |  |

**Table S2: Mean macrophage infection rate and infection ratio of both the resistant strains compared to the wild type line at 24hpi.** Results are expressed as the mean percentage infected macrophages or infection ratio (#amastigotes/#macrophages)  $\pm$  standard error of mean (SEM) and are based on one experiment run in sextuplet.

| 24hpi                  | LEM3323Cl <sub>4</sub> | LEM3323Cl <sub>4</sub> /1044Cl <sub>1</sub> | LEM3323Cl <sub>4</sub> /8012Cl <sub>2</sub> |
|------------------------|------------------------|---------------------------------------------|---------------------------------------------|
| % Infected macrophages | 87 $\pm$ 3             | 86 $\pm$ 2                                  | 87 $\pm$ 5                                  |
| Infection ratio        | 6.2 $\pm$ 0.8          | 7.7 $\pm$ 0.6                               | 6.1 $\pm$ 0.8                               |

**Table S3: *In vitro* activity of the efflux pump inhibitors on intracellular amastigotes and extracellular promastigotes of the *L. infantum* and *L. donovani* laboratory strains.** Results are expressed as the mean IC<sub>50</sub> ( $\mu$ M)  $\pm$  standard error of mean (SEM) and are based on two independent replicates run in duplicate (*n*=4).

|                                  |                    | Verapamil   | Cyclosporine A | Probenecid  |
|----------------------------------|--------------------|-------------|----------------|-------------|
| Intracellular amastigote assay   | <i>L. infantum</i> | 10 $\mu$ M  | 2 $\mu$ M      | > 4.5 mM    |
|                                  | <i>L. donovani</i> | 10 $\mu$ M  | 4 $\mu$ M      | > 4.5 mM    |
|                                  | Cytotoxicity       | 64 $\mu$ M  | 10 $\mu$ M     | > 4.5 mM    |
| Extracellular promastigote assay | <i>L. infantum</i> | 100 $\mu$ M | 14 $\mu$ M     | 875 $\mu$ M |
|                                  | <i>L. donovani</i> | 40 $\mu$ M  | 15 $\mu$ M     | 875 $\mu$ M |

# CNV analysis

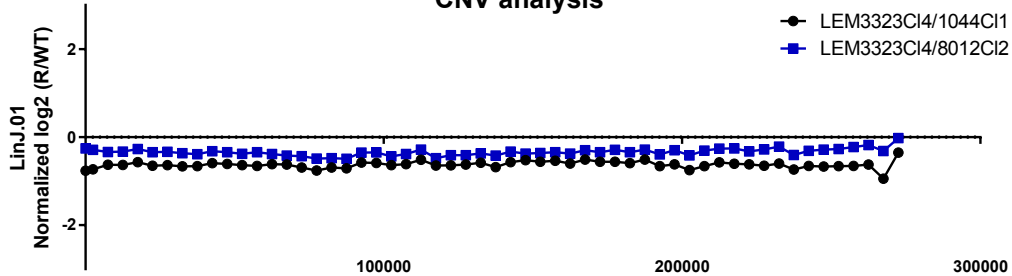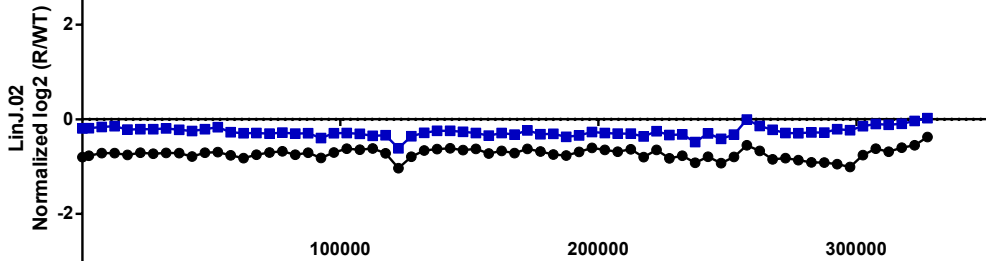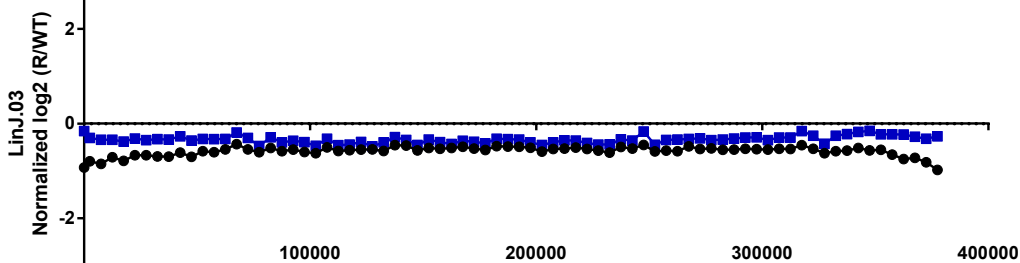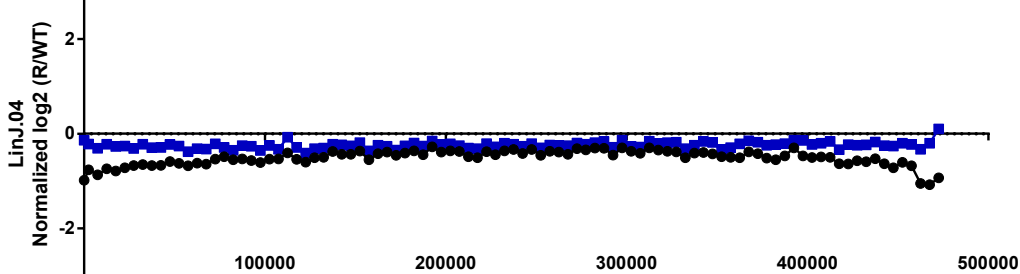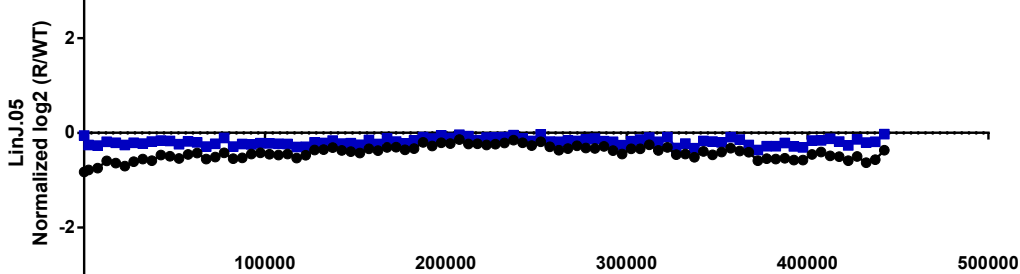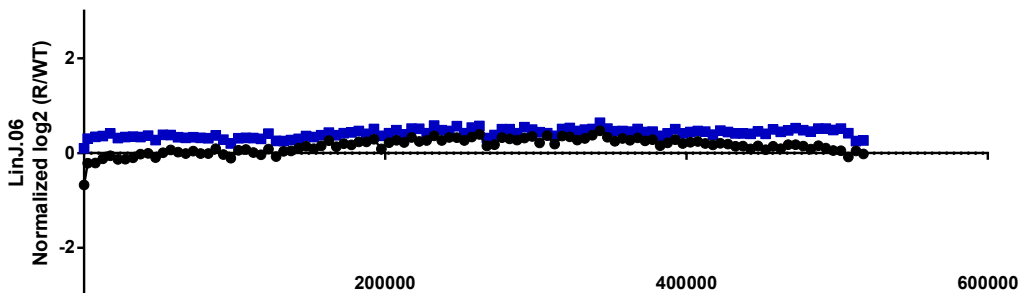

Chromosome position

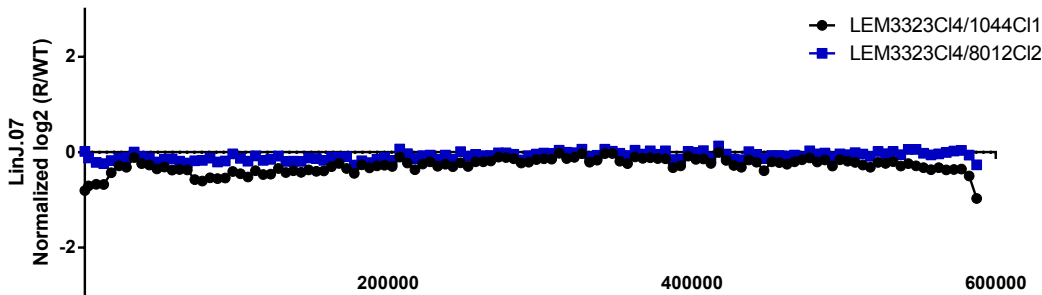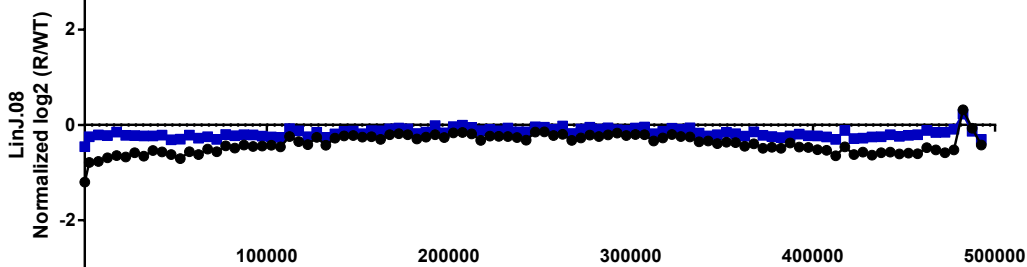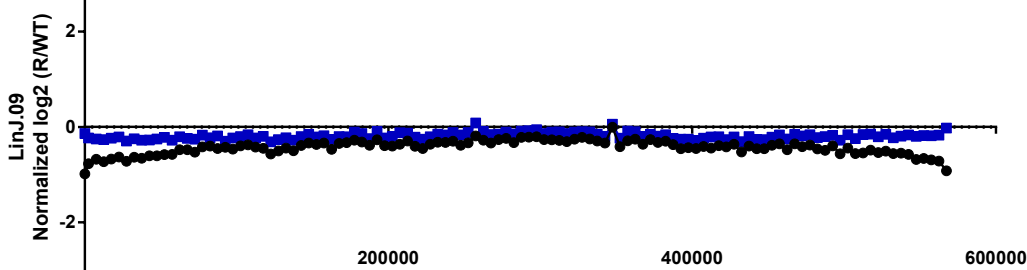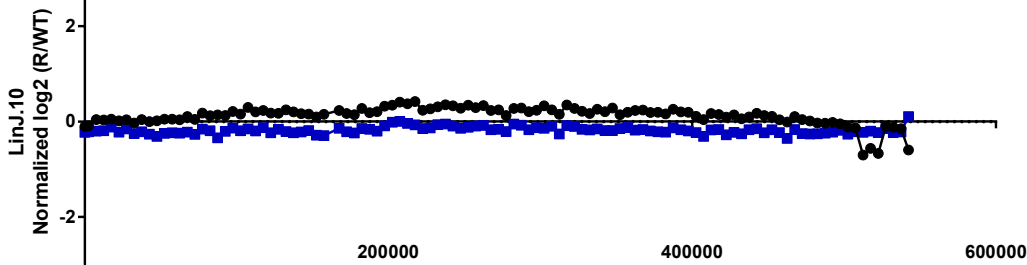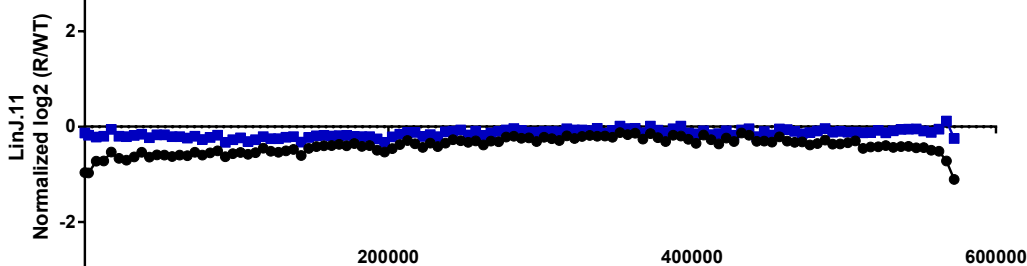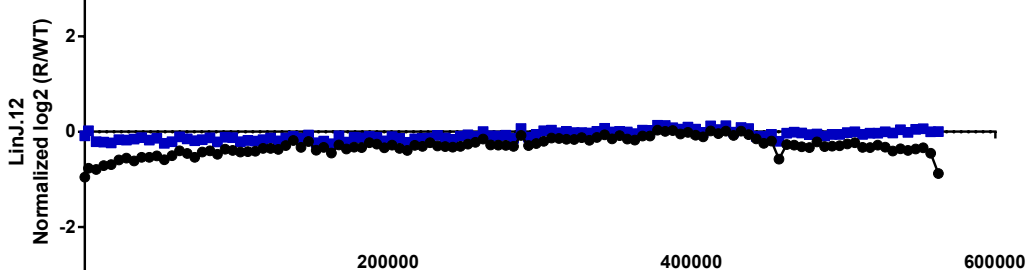

Chromosome position

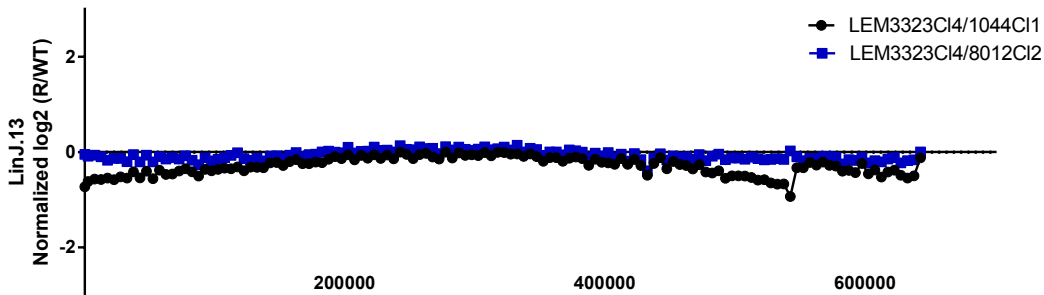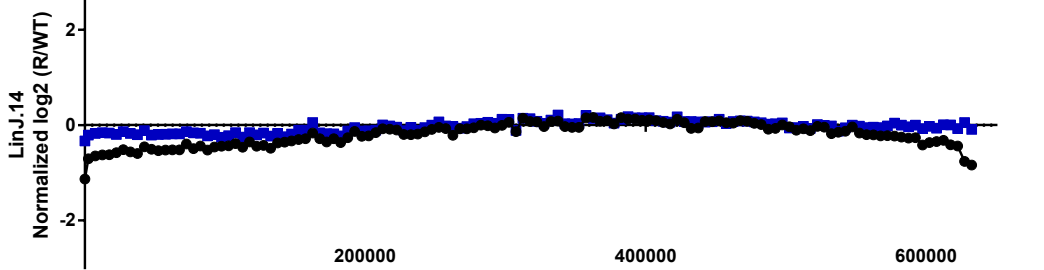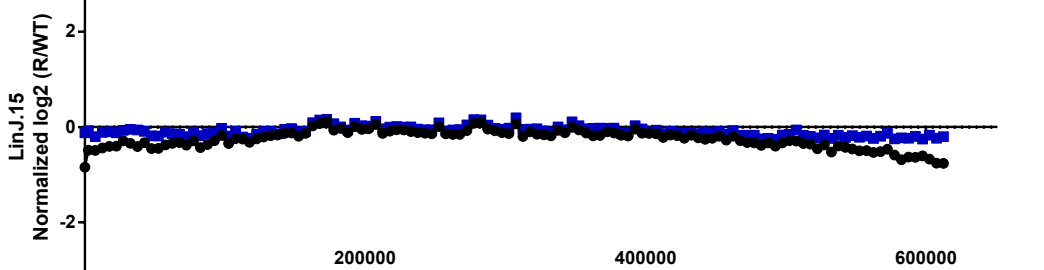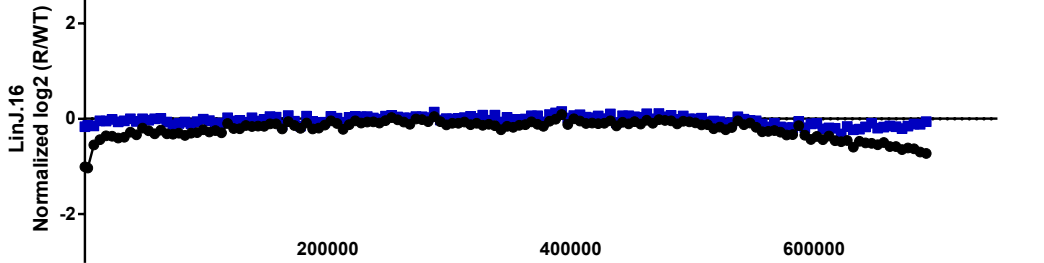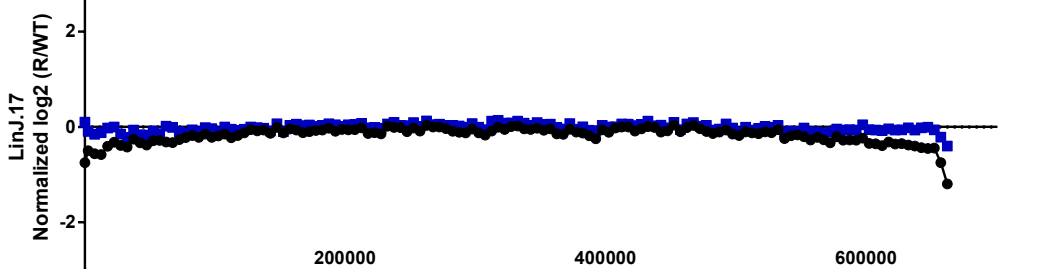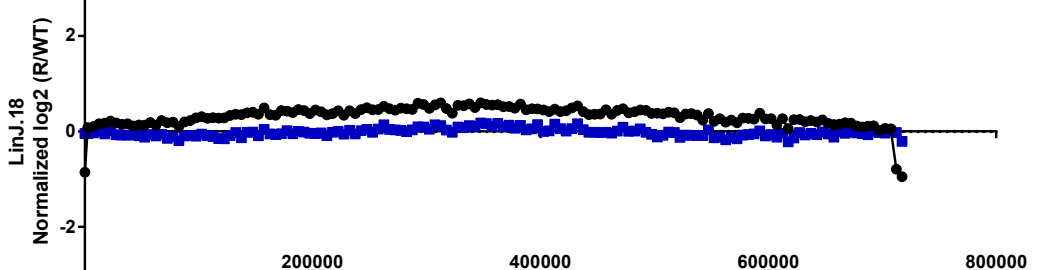

Chromosome position

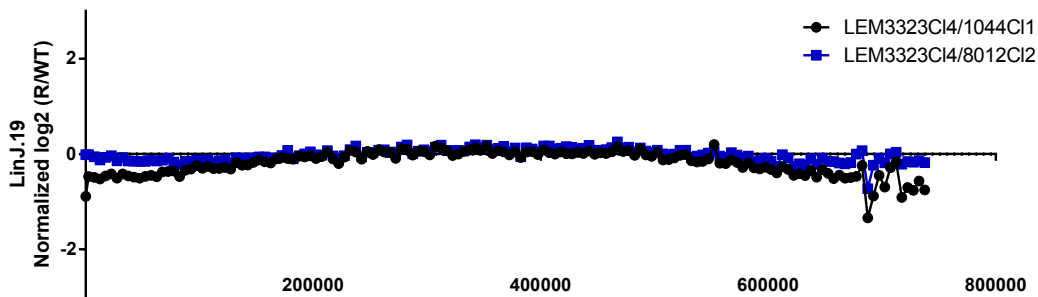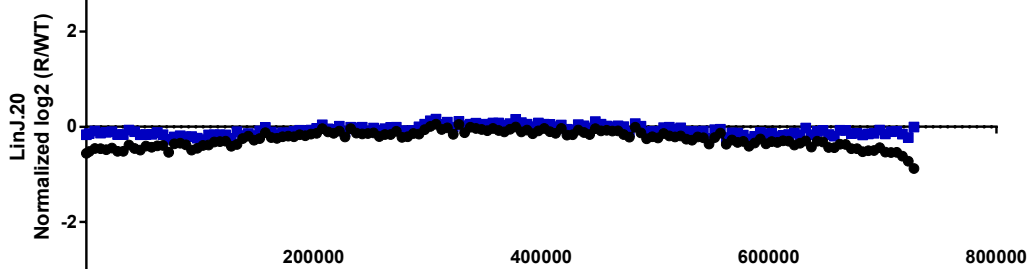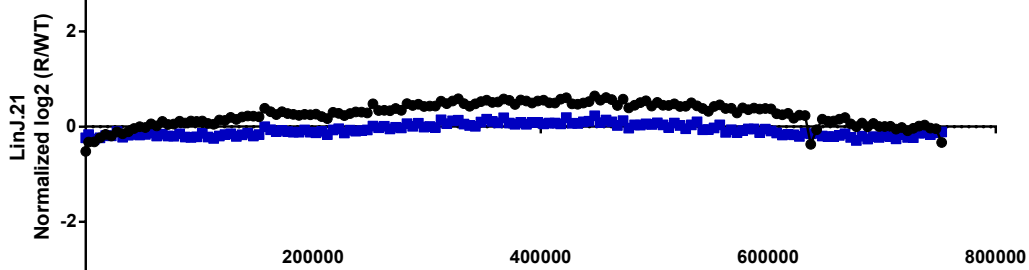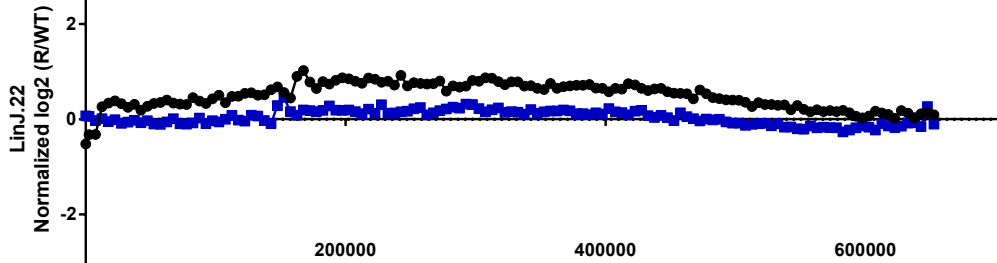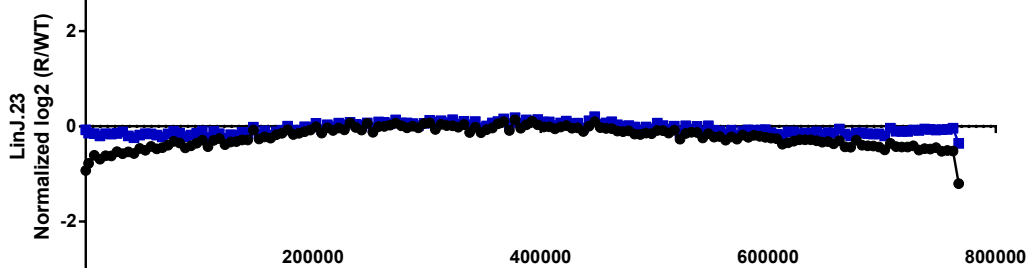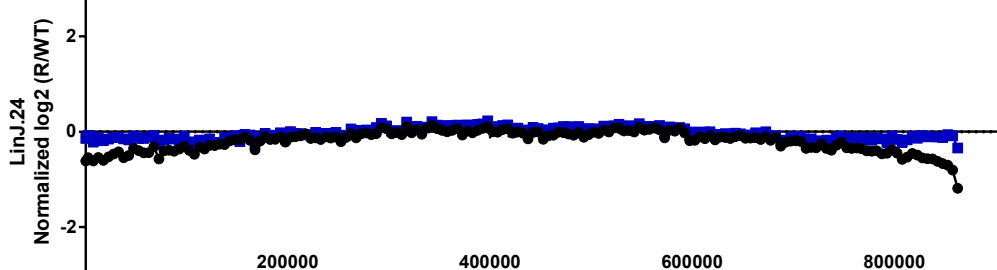

Chromosome position

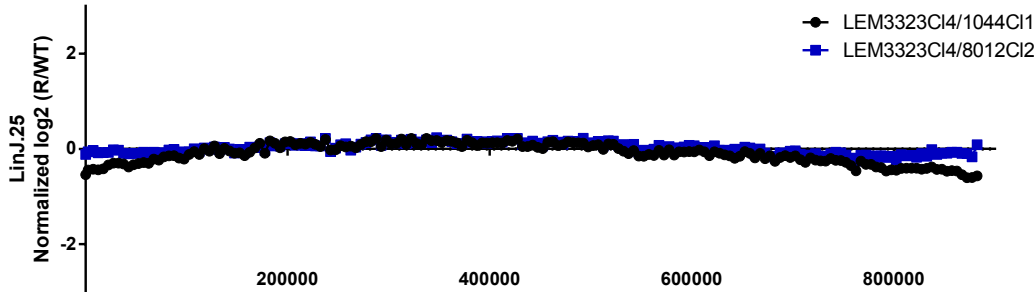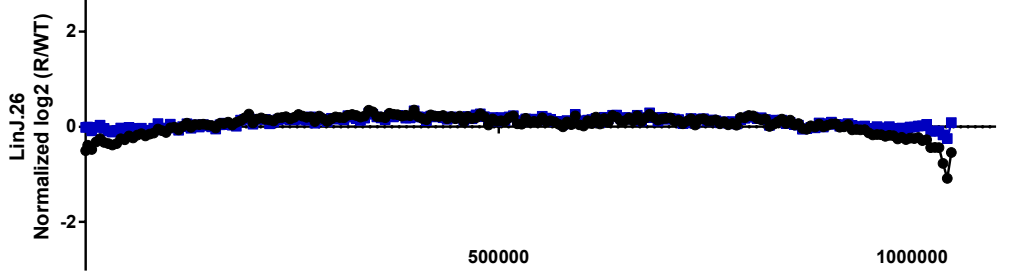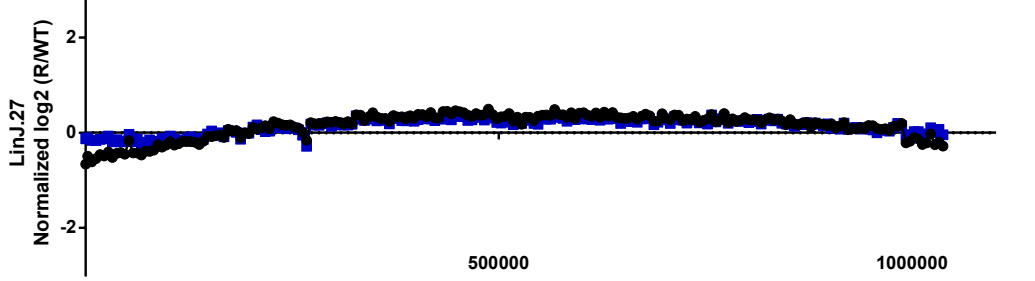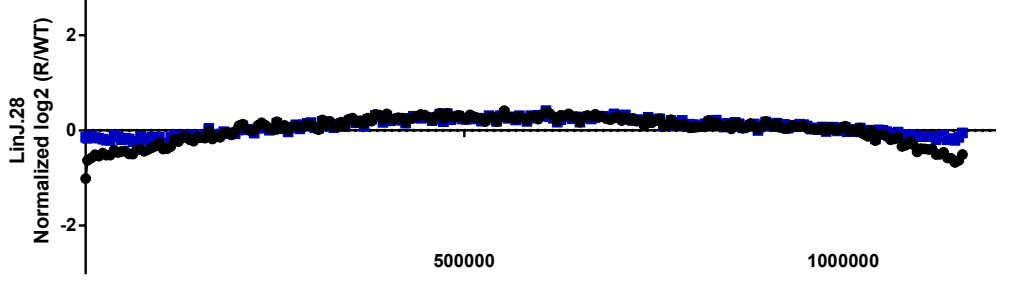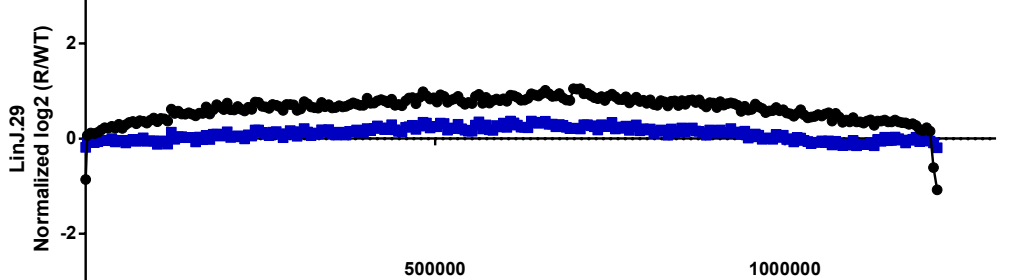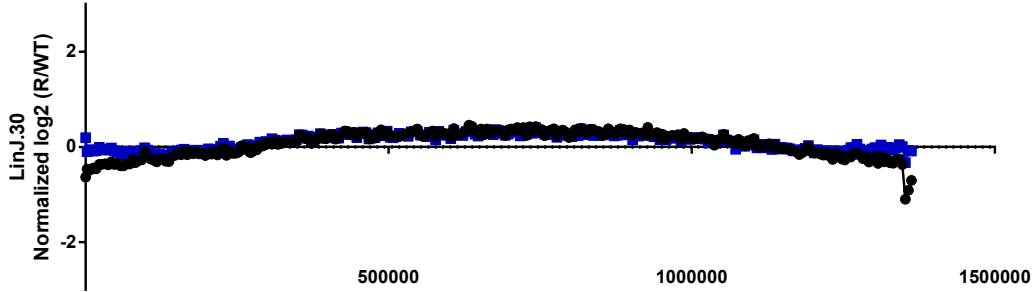

Chromosome position



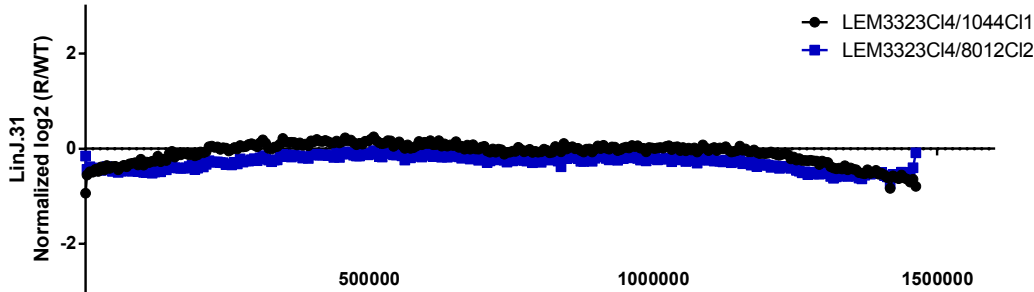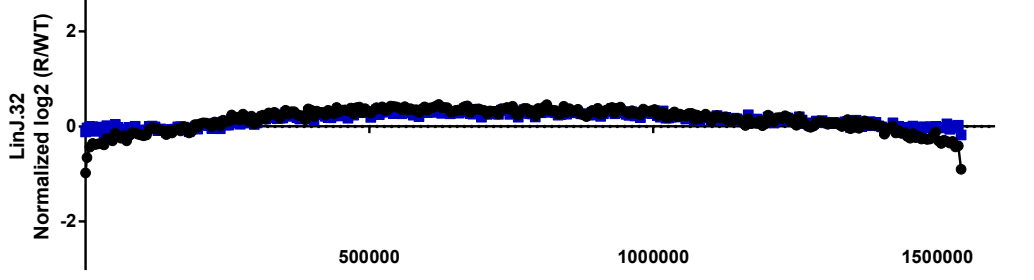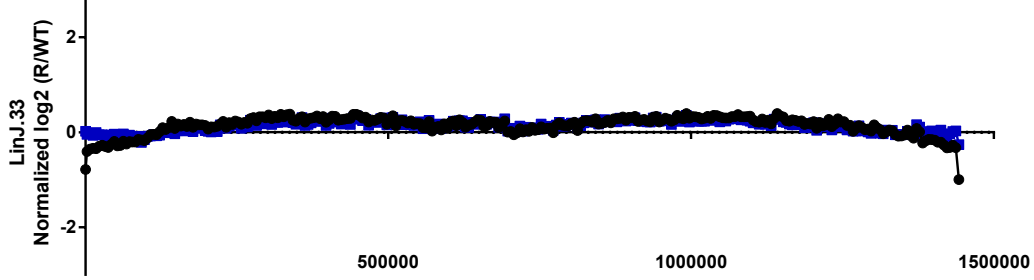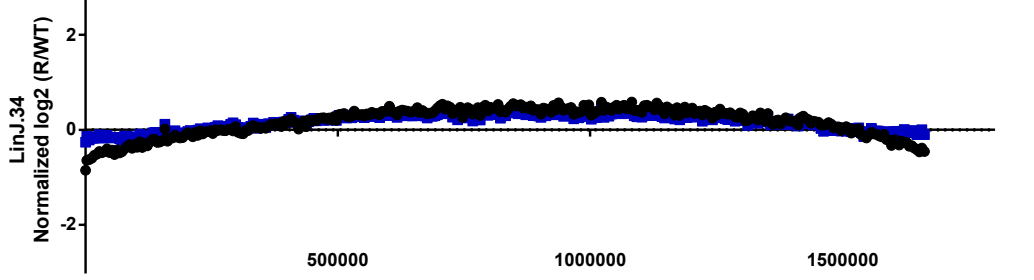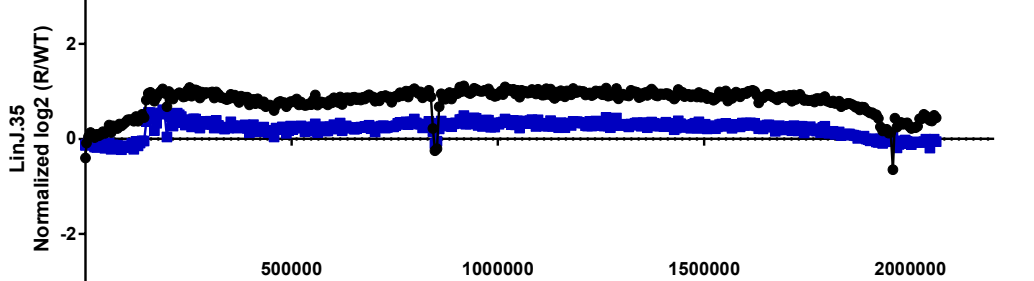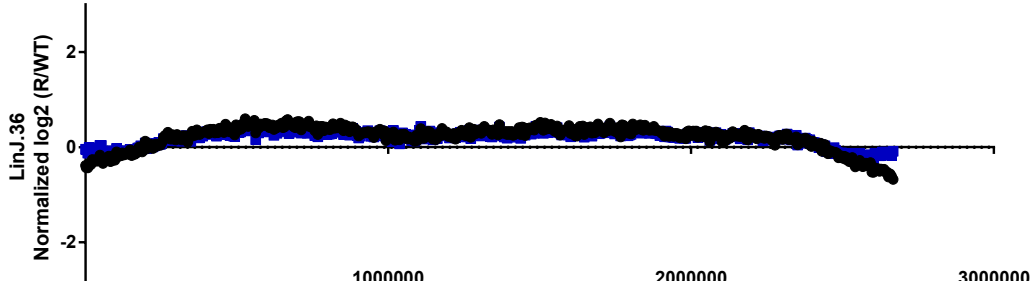

Chromosome position
